# Supplementary material
Source: PubMed Central journal article supplement (PMC8057680)
Supplement: ehp7804.s001.acco.pdf [file ehp7804.s001.acco.pdf]

**Note to readers with disabilities:** *EHP* strives to ensure that all journal content is accessible to all readers. However, some figures and Supplemental Material published in *EHP* articles may not conform to [508 standards](#) due to the complexity of the information being presented. If you need assistance accessing journal content, please contact [ehp508@niehs.nih.gov](mailto:ehp508@niehs.nih.gov). Our staff will work with you to assess and meet your accessibility needs within 3 working days.

### **Supplemental Material**

#### **Occurrence of Lead and Other Toxic Metals Derived from Drinking-Water Systems in Three West African Countries**

Michael B. Fisher, Amy Z. Guo, J. Wren Tracy, Sridevi K. Prasad, Ryan D. Cronk, Emily G. Browning, Kaida R. Liang, Emma R. Kelly, and Jamie K. Bartram

#### **Table of Contents**

**Table S1.** Positive predictive value (PPV), negative predictive value (NPV), and percent agreement between test and retest WHO GV exceedance results for TMs in test-retest comparisons of water samples from the same water systems (N=109).

**Table S2.** Mean, median, and maximum relative mass fraction of 13 metals from water system component scrapings (N=61 systems).

**Table S3.** Multivariable linear regressions for associations between concentrations of TM of interest and other measured metals (controlling for country, pH, conductivity, and stagnation time).

**Table S4.** Normalized multivariable linear regression for associations between concentrations of lead and other measured metals (controlling for country, pH, conductivity, and stagnation time).

**Table S5.** Multivariable regression of log lead occurrence controlling for log lead groundwater occurrence and controlling for other relevant covariates (pH, conductivity, water system type, water system age, stagnation time, and country).

**Table S6.** Comparison of Ghana and Mali Samples to UNC Reanalysis of Duplicate Aliquots.

**Figure S1.** Indicative Calibration Curves.

**Additional File-** Excel Documents

## Supporting Information

Table S1. Positive predictive value (PPV), negative predictive value (NPV), and percent agreement between test and retest WHO GV exceedance results for TMs in test-retest comparisons of water samples from the same water systems (N=109).

|                | Antimony | Arsenic | Cadmium | Chromium | Copper | Iron | Lead | Manganese | Mercury | Nickel | Selenium |
|----------------|----------|---------|---------|----------|--------|------|------|-----------|---------|--------|----------|
| PPV*           | 0%       | 0%      | 0%      | 0%       | N/A    | 17%  | 33%  | 14%       | N/A     | 0%     | 0%       |
| NPV**          | 100%     | 100%    | 100%    | 99%      | 100%   | 96%  | 95%  | 99%       | 100%    | 100%   | 100%     |
| % Agreement*** | 85%      | 99%     | 85%     | 97%      | 100%   | 92%  | 90%  | 94%       | 100%    | 97%    | 99%      |

\*PPV (Positive predictive value) is defined here as the proportion of sources exceeding the applicable WHO GV in the initial test that also exceeded the WHO GV in the re-test.\*\*NPV (Negative predictive value) is defined here as the proportion of sources not exceeding (i.e. conforming to) the applicable WHO GV in the initial test that also did not exceed the WHO GV in the re-test.

\*\*\*Agreement is defined here as the proportion of sources that either a) exceeded the applicable WHO GV at both test and retest, or else b) did not exceed (i.e. that conformed to) the applicable WHO GV at both test and at retest.

The results presented in this table indicate that even where NPV and % Agreement is high, PPV is relatively low for TMs of interest.

*Table S2. Mean, median, and maximum relative mass fraction of 13 metals from water system component scrapings (N=61 systems).*

|                        | <b>Antimony</b> | <b>Arsenic</b> | <b>Cadmium</b> | <b>Chromium</b> | <b>Copper</b> | <b>Iron</b> | <b>Lead</b> | <b>Manganese</b> | <b>Mercury</b> | <b>Nickel</b> | <b>Selenium</b> | <b>Tin</b> | <b>Zinc</b> |
|------------------------|-----------------|----------------|----------------|-----------------|---------------|-------------|-------------|------------------|----------------|---------------|-----------------|------------|-------------|
| <b>Arithmetic Mean</b> | 0.21%           | 0.30%          | 0.00%          | 7.63%           | 9.65%         | 35.28%      | 6.35%       | 2.84%            | 0.00%          | 12.86%        | 0.00%           | 1.48%      | 23.38%      |
| <b>Median</b>          | 0.01%           | 0.02%          | 0.00%          | 2.39%           | 0.73%         | 35.12%      | 0.12%       | 0.73%            | 0.00%          | 6.02%         | 0.00%           | 0.05%      | 4.49%       |
| <b>Maximum</b>         | 7.12%           | 12.46%         | 0.05%          | 46.57%          | 74.96%        | 97.32%      | 74.37%      | 78.58%           | 0.05%          | 73.61%        | 0.04%           | 35.58%     | 99.40%      |

The results presented in this table indicate that component scrapings from some components and systems contained substantive mass fractions of lead as a TM of public health concern.

Table S3. Multivariable linear regressions for associations between concentrations of TM of interest and other measured metals (controlling for country, pH, conductivity, and stagnation time).

|           | Antimony   | Arsenic | Cadmium    | Chromium  | Copper    | Iron     | Lead     | Manganese | Mercury  | Nickel   | Selenium | Tin       | Zinc     |
|-----------|------------|---------|------------|-----------|-----------|----------|----------|-----------|----------|----------|----------|-----------|----------|
| Antimony  |            | 0.002   | 0.515      | 0.048*    | 7.2E-4    | 3.2E-5*  | -0.003   | -3.7E-4   | 0.377    | -0.006   | 0.0150   | -0.015*** | -1.3E-4  |
| Arsenic   | 2.088      |         | -3.822     | -0.314    | 0.005     | -1.2E-4  | 0.046    | 2.4E-4    | -3.178   | -0.032   | -0.144   | 0.093     | 5.6E-4   |
| Cadmium   | 0.014      | -8.9E-5 |            | -0.018*** | 8.0E-4*** | -2.99E-6 | 0.002    | 2.2E-4**  | 0.036    | 0.003    | 0.003    | -5.7E-4   | 1.4E-5   |
| Chromium  | 0.623*     | -0.003  | -8.270***  |           | 0.013***  | 7.3E-5   | 0.220*** | 0.002     | 1.060    | 0.008    | 0.023    | 0.020*    | -4.2E-4  |
| Copper    | 4.102      | 0.024   | 161.556*** | 5.731***  |           | -0.003*  | 3.157*** | -0.081*   | -7.478   | 2.628*** | -0.338   | 0.124     | -0.008   |
| Iron      | 678.785*   | -2.153  | -2277.594  | 120.454   | -10.109*  |          | 47.051   | 9.852***  | -411.828 | 59.160   | 30.153   | -20.829   | 3.540*** |
| Lead      | -0.292     | 0.004   | 6.344      | 1.889***  | 0.062***  | 2.5E-4   |          | 0.002     | -2.673   | -0.153   | -0.053   | -0.034    | 0.002**  |
| Manganese | -9.064     | 0.005   | 186.202**  | 2.846     | -0.342*   | 0.011*** | 0.368    |           | -21.310  | 1.291    | -0.998   | 0.420     | 0.002    |
| Mercury   | 0.023      | -1.6E-4 | 0.079      | 0.005     | -8.1E-5   | -1.2E-6  | -0.001   | -5.5E-5   |          | 7.4E-4   | 7.1E-4   | 5.4E-4    | 1.1E-5   |
| Nickel    | -0.422     | -0.002  | 6.585      | 0.043     | 0.310***  | 1.9E-4   | -0.092   | 0.004     | 0.797    |          | -0.001   | 0.003     | -1.6E-4  |
| Selenium  | 0.951      | -0.008  | 5.71       | 0.110     | -0.004    | 8.9E-5   | -0.030   | -0.003    | 0.728    | -0.001   |          | 0.077***  | -1.5E-4  |
| Tin       | -11.035*** | 0.061   | -16.217    | 1.247*    | 0.017     | -7.8E-4  | -0.242   | 0.014     | 6.952    | 0.040    | 0.976*** |           | 0.003    |
| Zinc      | -112.447   | 0.448   | 479.987    | -31.294   | -1.389    | 0.161*** | 17.040** | 0.093     | 169.954  | -2.328   | -2.338   | 3.139     |          |

Note: \*p<0.05; \*\*p<0.01; \*\*\*p<0.001

The results presented in this table indicate strong associations between several TMs of interest and other TMs and/or “indicator” metals such as copper, iron, tin, and zinc. Of particular interest, lead concentration was strongly associated with chromium, copper, and zinc.

*Table S4. Normalized multivariable linear regression for associations between concentrations of lead and other measured metals (controlling for country, pH, conductivity, and stagnation time).*

|                                         | <b>Antimony</b> | <b>Arsenic</b> | <b>Cadmium</b> | <b>Chromium</b> | <b>Copper</b> | <b>Iron</b> | <b>Lead</b> | <b>Manganese</b> | <b>Mercury</b> | <b>Nickel</b> | <b>Selenium</b> | <b>Tin</b> | <b>Zinc</b> |
|-----------------------------------------|-----------------|----------------|----------------|-----------------|---------------|-------------|-------------|------------------|----------------|---------------|-----------------|------------|-------------|
| <b>Lead</b>                             | -0.292          | 0.004          | 6.344          | 1.889***        | 0.062***      | 2.5E-4      |             | 0.002            | -2.673         | -0.153        | -0.053          | -0.034     | 0.002**     |
| Normalized effect (coeff./median conc.) | 0.0292          | 0.001          | 0.317          | 0.945           | 0.682         | 0.013       |             | 0.014            | -0.134         | -0.153        | -0.025          | -0.013     | 0.011       |

Note: \*p<0.05; \*\*p<0.01; \*\*\*p<0.001

The results presented in this table indicate that lead concentration was associated with concentrations of chromium, copper, and zinc.

Table S5. Multivariable regression of log lead occurrence controlling for log lead groundwater occurrence and controlling for other relevant covariates (pH, conductivity, water system type, water system age, stagnation time, and country).

|                                |            | Adjusted Estimate (Standard Error) |
|--------------------------------|------------|------------------------------------|
| <b>N</b>                       |            | 104                                |
| <b>R<sup>2</sup></b>           |            | 0.27                               |
| <b>Country</b>                 | Ghana      | REF                                |
|                                | Mali       | 0.36 (0.32)                        |
| <b>Water System Type</b>       | Handpump   | REF                                |
|                                | Public Tap | 1.31** (0.41)                      |
| <b>Age of Water System</b>     |            | 0.016 (0.016)                      |
| <b>Stagnation Time</b>         |            | 7.5E <sup>-4</sup> (0.002)         |
| <b>pH</b>                      |            | -0.380 (0.221)                     |
| <b>Conductivity</b>            |            | 3.5E <sup>-4</sup> (4.5E-4)        |
| <b>Log Lead in Groundwater</b> |            | 0.694*** (0.163)                   |

Note: \*p<0.05; \*\*p<0.01; \*\*\*p<0.001

The results presented in this table indicate that lead concentration in water samples was associated with water system type and log lead concentration in fully-flushed groundwater samples in the multivariable regression results shown. Estimate is adjusted for age of water system,

Table S6. Comparison of Ghana and Mali Samples to UNC Reanalysis of Duplicate Aliquots

A) Relative Percent Deviation

| Country | Sample ID | Antimony | Arsenic | Cadmium  | Chromium | Copper  | Lead     | Manganese | Mercury | Nickel | Selenium | Zinc    | Tin      | Uranium  | Iron     | Calcium | Magnesium | Potassium | Sodium  |
|---------|-----------|----------|---------|----------|----------|---------|----------|-----------|---------|--------|----------|---------|----------|----------|----------|---------|-----------|-----------|---------|
| Ghana   | 7961805   | 74747%   | 689%    | -79400%  | -871%    | -32%    | -1230%   | -4341%    | -21717% | 98%    | 4294%    | 43%     | 741337%  | 8692%    | -21%     | -683%   | -355%     | -1325%    | 81%     |
| Ghana   | 7961808   | -129%    | -1916%  | 5519%    | -130%    | 324%    | -9435%   | -832%     | -62906% | 89%    | -8117%   | -4358%  | -231739% | -28%     | -253333% | -143%   | 93%       | 55%       | -2529%  |
| Ghana   | 7961826   | 5421%    | -883%   | 4836%    | -802%    | 170%    | 523%     | -899%     | 1379%   | 100%   | -4032%   | 23%     | 17081%   | 140%     | -165%    | -46%    | 68%       | 69%       | -3062%  |
| Ghana   | 7961847   | 202377%  | -172%   | -170237% | -3203%   | -8237%  | -11514%  | -2099%    | -15219% | 99%    | -3709%   | -2266%  | 1566222% | 3968%    | -6347%   | 16%     | 26%       | -122%     | 27%     |
| Ghana   | 8189518   | 3120%    | -115%   | 2840%    | -6532%   | 98%     | -117%    | -366%     | -26896% | 100%   | -32402%  | 53%     | 865%     | -244063% | 80%      | -295%   | -1465%    | -91%      | -15614% |
| Ghana   | 8189534   | -1513%   | -1028%  | 2988%    | 1147%    | 188%    | 175%     | 87%       | 3930%   | 100%   | 85666%   | 100%    | -10570%  | -867%    | 87%      | 79%     | 50%       | 75%       | -988%   |
| Ghana   | 8189620   | 13881%   | 490%    | -482%    | -850%    | -4450%  | 235%     | 93%       | -6978%  | -139%  | 34265%   | -259%   | 30312%   | 50959%   | -916%    | -372%   | -10%      | 69%       | 79%     |
| Ghana   | 8189634   | 142363%  | 329%    | -53546%  | -2658%   | 59%     | 119%     | -47%      | -27821% | 100%   | 32253%   | 79%     | 198877%  | -8667%   | 5%       | -2548%  | -3057%    | -3769%    | -11111% |
| Ghana   | 8189637   | 47157%   | -1028%  | -23188%  | -7182%   | 63%     | -59%     | -351%     | -21394% | 99%    | -216245% | 11%     | 71888%   | 6651%    | -6915%   | -1489%  | -3144%    | -1021%    | -1216%  |
| Ghana   | 8189640   | 12350%   | -2661%  | -28052%  | -1006%   | -1337%  | 1574%    | -113%     | -8028%  | 100%   | 194310%  | 67%     | 393624%  | 5313%    | 15%      | 56%     | 43%       | 56%       | -220%   |
| Ghana   | 8189645   | 9626%    | 2563%   | -614%    | -791%    | -16705% | -406%    | -36%      | -11833% | 100%   | -11529%  | -533%   | -65435%  | 271%     | -6403%   | -7%     | 71%       | -187%     | 81%     |
| Ghana   | 8189752   | 1125%    | 201%    | 111%     | -4264%   | 36%     | 97%      | -89%      | -25287% | 96%    | 11768%   | -374%   | 2569%    | 138%     | -636%    | 14%     | 69%       | 50%       | 68%     |
| Ghana   | 8189758   | 96%      | 294%    | 254%     | -3223%   | 107%    | 379%     | -1083%    | -9728%  | -837%  | 10246%   | 84%     | 5148%    | 106%     | -483%    | 19%     | 79%       | -346%     | 96%     |
| Ghana   | 8189759   | 1004%    | 321%    | -19023%  | -5893%   | 802%    | 2974%    | -546%     | -6292%  | -3291% | -127903% | -2329%  | 63789%   | 237%     | -3427%   | -232%   | 88%       | 48%       | -159%   |
| Ghana   | 8189763   | 268874%  | 225%    | -319951% | -6858%   | -4863%  | -5894%   | 16%       | -17333% | -4638% | 40727%   | -1546%  | 993992%  | 57875%   | 84%      | 63%     | 72%       | -2022%    | 92%     |
| Ghana   | 8189768   | 7452%    | -398%   | -6149%   | 1048%    | 108%    | 160%     | 114%      | 48583%  | 100%   | 32737%   | 104%    | 237480%  | 4428%    | 113%     | 98%     | 97%       | 94%       | 55%     |
| Ghana   | 8189778   | 9450%    | 517%    | -53897%  | -1763%   | -1035%  | -285%    | -472%     | -24031% | 99%    | 116075%  | -121%   | 199009%  | 2709%    | 89%      | 52%     | 6%        | 47%       | 58%     |
| Ghana   | 8189785   | -10432%  | 635%    | 48368%   | -2959%   | -27%    | 69%      | 95%       | -14398% | 95%    | -15093%  | -33%    | -35000%  | 73%      | -49%     | 75%     | 92%       | -35%      | 87%     |
| Ghana   | 8189786   | 60833%   | 1835%   | -11058%  | -402%    | -120%   | 78%      | 84%       | -3864%  | 100%   | -80108%  | 73%     | 49936%   | -7895%   | 99%      | -62%    | -918%     | -127%     | -5165%  |
| Ghana   | 8189794   | 82516%   | 7738%   | -19701%  | -5407%   | 45%     | 70%      | 92%       | 19627%  | 100%   | 16401%   | 66%     | 303924%  | 1996%    | -316%    | -26%    | -5%       | -12%      | -7%     |
| Ghana   | 8189797   | 11452%   | 4831%   | 348%     | -1346%   | -29%    | -3483%   | 75%       | -42408% | 100%   | -        | -54%    | 13778%   | 5175%    | -236%    | -1334%  | -1060%    | -8%       | -471%   |
| Ghana   | 8189852   | 7252%    | -1286%  | -5314%   | -456%    | -1554%  | 1290%    | 96%       | -11871% | 100%   | -18211%  | -7839%  | 183592%  | 6680%    | -64288%  | 23%     | 55%       | 32%       | -12%    |
| Ghana   | 8189853   | 49035%   | 164%    | -511428% | -2968%   | -15650% | -1116%   | -5399%    | -47876% | 99%    | 160886%  | -6597%  | 423200%  | 29443%   | 96%      | 24%     | 58%       | -1363%    | 82%     |
| Ghana   | 8189854   | -1873%   | -1157%  | 150236%  | -1448%   | -12092% | -721531% | -2439%    | -36682% | 99%    | 10841%   | -7572%  | -313663% | 77%      | -17479%  | 47%     | 91%       | 57%       | 35%     |
| Ghana   | 8189857   | 82273%   | 148%    | -48997%  | -1350%   | -88448% | -686%    | -1007%    | -4664%  | 94%    | -17789%  | -401%   | 999952%  | 911%     | 83%      | 95%     | 82%       | 79%       | 100%    |
| Ghana   | 8189865   | 1563%    | 972%    | 164837%  | -193%    | 3471%   | -11299%  | 95%       | -13534% | -3389% | -2213%   | -573%   | -120120% | 202%     | -466%    | -27%    | 90%       | -34%      | -620%   |
| Ghana   | 8189883   | 4968%    | -410%   | -66396%  | -794%    | -34481% | -28792%  | -284%     | 1563%   | 97%    | 2392%    | -44472% | -275051% | 140%     | -1641%   | 31%     | 78%       | 8%        | 88%     |
| Ghana   | 8189900   | 34337%   | 1563%   | 26529%   | -582%    | -1779%  | 3171%    | 25%       | -48746% | 98%    | 1378%    | -64%    | -43708%  | 5294%    | -10372%  | -20%    | 30%       | 63%       | -38%    |
| Ghana   | 8189912   | 16461%   | -2816%  | -1146%   | -633%    | 84%     | 175%     | -733%     | -11129% | 100%   | -333%    | 91%     | 10648%   | 10335%   | -7402%   | -316%   | -106%     | 1%        | -46%    |
| Ghana   | 8189921   | 131585%  | 1244%   | -10843%  | -6%      | 535%    | 5014%    | 235%      | 15862%  | 100%   | 3412%    | 25%     | 1008785% | 1722%    | -1399%   | 28%     | 29%       | 84%       | 8%      |

|       |         |          |        |          |         |         |        |         |           |       |          |        |          |        |        |        |        |        |        |
|-------|---------|----------|--------|----------|---------|---------|--------|---------|-----------|-------|----------|--------|----------|--------|--------|--------|--------|--------|--------|
| Ghana | 8189951 | 556118%  | 6033%  | -341533% | -18406% | -1830%  | 2029%  | -852%   | 1757%     | 100%  | -        | -58%   | 1839219% | 7148%  | 100%   | 59%    | 82%    | 95%    | 88%    |
| Ghana | 8189957 | 1013779% | -4960% | -        | 108%    | 1790%   | 1633%  | -371%   | 36236%    | 100%  | 546%     | 91%    | 1380001% | 3066%  | 115%   | -1626% | -2443% | -461%  | -1051% |
| Ghana | 8189964 | 23889%   | 13105% | -4513%   | -19455% | 98%     | -18%   | 33%     | -13500%   | 100%  | -119550% | 63%    | 26580%   | 1278%  | -316%  | -      | -4988% | -6229% | -4969% |
| Ghana | 8189966 | 48812%   | 1833%  | -34674%  | -2716%  | 92%     | 97%    | 45%     | -38702%   | 100%  | 181819%  | 90%    | 118345%  | 616%   | -873%  | -883%  | -1281% | 74%    | -4456% |
| Ghana | 8189970 | 1213%    | -552%  | -712%    | -506%   | 99%     | 89%    | 97%     | -465429%  | 100%  | 17038%   | 99%    | 881%     | 300%   | -1426% | -2103% | -4893% | -2193% | -3434% |
| Ghana | 8191543 | 15139%   | 663%   | -11185%  | -3409%  | 92%     | 95%    | -1388%  | -206904%  | 100%  | -108384% | 75%    | 1725%    | 700%   | -323%  | 78%    | 74%    | 97%    | -766%  |
| Ghana | 8191552 | 36605%   | 925%   | -8729%   | -7048%  | 79%     | 99%    | -1313%  | -15047%   | 100%  | -249538% | 44%    | 49551%   | 1945%  | -299%  | -765%  | -1263% | 88%    | -5773% |
| Ghana | 8995989 | 94936%   | 308%   | -3326%   | -3263%  | -4827%  | -765%  | 44%     | -5734%    | 99%   | 72229%   | -570%  | 170445%  | 23990% | 80%    | 84%    | 87%    | 71%    | 97%    |
| Ghana | 8995990 | 115545%  | 194%   | -345805% | -3545%  | -5441%  | 1%     | -556%   | -4252%    | -180% | -6326%   | -113%  | 234336%  | 8162%  | -398%  | -85%   | -838%  | -482%  | 92%    |
| Ghana | 9129588 | -14897%  | 583%   | 10572%   | -187%   | 230%    | -342%  | -39829% | -60435%   | 100%  | -27612%  | -95%   | -78749%  | 93%    | 53%    | 14%    | 61%    | 15%    | -461%  |
| Ghana | 9129592 | 3468%    | 465%   | 77707%   | -7335%  | -69686% | -1694% | -3438%  | -23198%   | 98%   | 2528%    | -136%  | -156901% | 104%   | -2848% | 54%    | 70%    | -65%   | 85%    |
| Ghana | 9129600 | 78476%   | 165%   | -135636% | 1875%   | 3642%   | 248%   | -629%   | -2801376% | 100%  | 1658%    | -193%  | 2751092% | 15540% | -5565% | -168%  | -237%  | -1998% | -368%  |
| Ghana | 9129800 | 211465%  | 142%   | -        | -1373%  | -1048%  | -69%   | -31323% | -15166%   | 100%  | -616908% | -58%   | 261411%  | 1596%  | 27%    | -1294% | -830%  | -660%  | -827%  |
| Ghana | 9129814 | 21584%   | 355%   | -54760%  | -1699%  | -41%    | -35%   | -723%   | -19430%   | 100%  | -97%     | -2838% | 171114%  | 106%   | -4381% | -183%  | 45%    | -1527% | 77%    |
| Ghana | 9129820 | 96596%   | 131%   | -84091%  | -5420%  | -1790%  | -4811% | 93%     | -17782%   | 100%  | 18759%   | -366%  | 1313193% | 430%   | -1555% | 35%    | 43%    | -120%  | 19%    |
| Ghana | 9129832 | 12337%   | 277%   | -104018% | -3346%  | 90%     | 100%   | -83%    | -10702%   | 98%   | -5167%   | 89%    | 49004%   | 176%   | -286%  | 92%    | 91%    | 72%    | 65%    |
| Mali  | 7964625 | -77%     | 50%    | 9%       | 63%     | -24%    | -105%  | 3%      | -2114%    | 100%  | -1%      | -20%   | -22553%  | -      | -57%   | -12%   | -20%   | -62%   | -31%   |
| Mali  | 7964716 | -81%     | 83%    | -1044%   | -48%    | -39%    | -192%  | -7%     | -         | 100%  | -1745%   | -27%   | -391%    | -      | -699%  | -9%    | -19%   | -28%   | -28%   |
| Mali  | 7964736 | 97%      | 87%    | -190%    | -14%    | -12%    | -52%   | -150%   | -16201%   | 100%  | -2972%   | 2%     | -31%     | -      | -62%   | -189%  | -29%   | -114%  | -38%   |
| Mali  | 8189671 | -6%      | 91%    | -12%     | 84%     | -17%    | -26%   | 75%     | -         | 100%  | -47739%  | -2%    | -15%     | -      | -22%   | -954%  | 79%    | -32%   | -36%   |
| Mali  | 8189744 | -132%    | -24%   | -77%     | 46%     | -338%   | -257%  | -1037%  | -975%     | 100%  | -        | -49%   | -284%    | -      | -166%  | -322%  | -133%  | -178%  | -125%  |
| Mali  | 8995831 | 8%       | 53%    | 1%       | -44%    | -10%    | -36%   | -226%   | -1416%    | 100%  | -5435%   | 4%     | -233%    | -      | -292%  | -574%  | -11%   | -26%   | -153%  |
| Mali  | 9129642 | -29%     | 80%    | -1660%   | 61%     | -74%    | -67%   | -222%   | -4094%    | 100%  | -2470%   | -63%   | -8571%   | -      | 5%     | -131%  | -54%   | -49%   | -51%   |
| Mali  | 9129670 | -38%     | 73%    | -13%     | -102%   | -26%    | -61%   | -3960%  | -264410%  | 100%  | -2079%   | -9%    | -372%    | -      | -620%  | -2045% | -57%   | -72%   | -8%    |
| Mali  | 9129752 | -29%     | 75%    | -165%    | 17%     | -36%    | -214%  | 99%     | -26418%   | 100%  | -6095%   | 6%     | -107%    | -      | -387%  | -134%  | -11%   | -26%   | -32%   |
| Mali  | 9129763 | 37%      | 57%    | -611%    | -43%    | -28%    | -508%  | 97%     | -1531%    | 100%  | -27560%  | 29%    | -757%    | -      | -1405% | -29%   | -19%   | -19%   | -11%   |
| Mali  | 9129768 | 88%      | 62%    | -1836%   | 51%     | -50%    | -405%  | -332%   | -12607%   | 100%  | -40703%  | -9%    | -225%    | -      | -86%   | -8%    | -22%   | -32%   | -30%   |
| Mali  | 9129786 | 69%      | 33%    | -66%     | 73%     | -24%    | -15%   | -197%   | -5517%    | 100%  | -23058%  | 7%     | -75%     | -      | -48%   | -27%   | -20%   | -15%   | -8%    |



B) Absolute Difference (mg/L)

| Country | Sample ID | Antimony | Arsenic  | Cadmium  | Chromium | Copper   | Lead     | Manganese | Mercury  | Nickel   | Selenium | Zinc     | Tin      | Uranium  | Iron     | Calcium  | Magnesium | Potassium | Sodium   |
|---------|-----------|----------|----------|----------|----------|----------|----------|-----------|----------|----------|----------|----------|----------|----------|----------|----------|-----------|-----------|----------|
| Ghana   | 7961805   | 0.021702 | 0.011802 | 0.003563 | 0.006322 | 0.007788 | 0.00501  | 0.039323  | 0.001076 | 0.38428  | 0.007299 | 0.02977  | 0.062442 | 0.001923 | 0.004401 | 14.42737 | 4.09794   | 7.168975  | 29.43738 |
| Ghana   | 7961808   | 3.74E-05 | 0.002796 | 0.000201 | 0.003135 | 0.000888 | 0.005014 | 0.034909  | 0.00072  | 0.043323 | 0.008487 | 1.192216 | 0.00692  | 1.88E-05 | 8.402572 | 19.10888 | 8.764228  | 1.093357  | 446.9163 |
| Ghana   | 7961826   | 0.000811 | 0.007165 | 0.000176 | 0.007736 | 0.003252 | 0.00124  | 0.025503  | 0.000101 | 2.106655 | 0.016827 | 0.005905 | 0.004517 | 0.000742 | 0.095398 | 8.70192  | 4.439531  | 1.880736  | 342.9006 |
| Ghana   | 7961847   | 0.023154 | 0.001085 | 0.003935 | 0.009715 | 0.024902 | 0.004981 | 0.002158  | 0.000299 | 0.391589 | 0.003681 | 0.070923 | 0.072312 | 0.002795 | 0.066688 | 1.406089 | 0.639148  | 6.941451  | 0.925589 |
| Ghana   | 8189518   | 0.001723 | 0.000918 | 0.000628 | 0.012026 | 0.00696  | 0.000456 | 0.002172  | 0.000837 | 0.520647 | 0.006406 | 0.074295 | 0.0009   | 0.040757 | 0.015804 | 23.45565 | 24.09425  | 2.014708  | 375.3557 |
| Ghana   | 8189534   | 0.000589 | 0.009518 | 0.001254 | 0.002879 | 0.016638 | 0.001062 | 0.008386  | 0.00011  | 0.761426 | 0.012608 | 0.052656 | 0.010133 | 0.000191 | 0.037448 | 5.560295 | 0.821548  | 1.630408  | 24.21131 |
| Ghana   | 8189620   | 0.005389 | 0.003034 | 0.000241 | 0.002207 | 0.162586 | 0.0017   | 0.194955  | 0.000282 | 1.872954 | 0.008262 | 0.012654 | 0.014163 | 0.004354 | 0.030934 | 5.422992 | 0.149341  | 5.27802   | 9.516945 |
| Ghana   | 8189634   | 0.020095 | 0.001904 | 0.003074 | 0.009045 | 0.067123 | 0.002925 | 0.004528  | 0.000285 | 1.309047 | 0.015719 | 0.146609 | 0.072443 | 0.002433 | 0.000758 | 24.96792 | 21.73641  | 2.645933  | 147.2625 |
| Ghana   | 8189637   | 0.020178 | 0.004931 | 0.004667 | 0.020399 | 0.028866 | 0.001224 | 0.027596  | 0.001288 | 1.042744 | 0.007607 | 0.008475 | 0.062747 | 0.00142  | 0.403978 | 33.42768 | 20.4108   | 3.010659  | 24.84182 |
| Ghana   | 8189640   | 0.000686 | 0.008427 | 0.000832 | 0.00918  | 0.006339 | 0.001172 | 0.000972  | 0.00045  | 0.774856 | 0.014003 | 0.046089 | 0.005017 | 0.000334 | 0.00724  | 3.367284 | 1.055798  | 0.836185  | 26.06741 |
| Ghana   | 8189645   | 0.001291 | 0.003555 | 3.71E-05 | 0.009203 | 0.027514 | 5.25E-05 | 0.003184  | 0.000453 | 1.001405 | 0.014015 | 0.019428 | 0.001324 | 1.86E-05 | 0.039626 | 0.724402 | 4.832135  | 1.825494  | 12.30204 |
| Ghana   | 8189752   | 0.001672 | 0.002385 | 4.44E-05 | 0.009279 | 0.004444 | 0.053665 | 0.007681  | 0.000712 | 0.186389 | 0.004864 | 0.642522 | 0.000397 | 0.000341 | 0.070572 | 2.67334  | 5.447281  | 3.512679  | 6.05414  |
| Ghana   | 8189758   | 4.42E-05 | 0.006894 | 2.96E-05 | 0.006049 | 0.010275 | 0.002152 | 0.007002  | 0.000284 | 0.000418 | 0.001705 | 0.01436  | 0.003494 | 0.004856 | 0.008672 | 2.510028 | 9.637785  | 4.917256  | 80.53415 |
| Ghana   | 8189759   | 0.000523 | 0.007902 | 0.000686 | 0.010224 | 0.001745 | 0.000995 | 0.007147  | 0.000362 | 0.001645 | 0.007827 | 0.036745 | 0.003628 | 0.000301 | 0.351837 | 17.04906 | 3.903413  | 0.680298  | 213.933  |
| Ghana   | 8189763   | 0.0231   | 0.012113 | 0.004118 | 0.006775 | 0.004605 | 0.001552 | 0.000294  | 0.000523 | 0.002319 | 0.002932 | 0.017101 | 0.066657 | 0.002428 | 0.184703 | 12.0279  | 4.76862   | 12.3165   | 29.39451 |
| Ghana   | 8189768   | 0.02152  | 0.004354 | 0.002479 | 0.002721 | 0.075187 | 0.005083 | 0.01205   | 0.000992 | 0.964719 | 0.006998 | 0.095724 | 0.065777 | 0.002973 | 0.014578 | 12.1628  | 4.537888  | 1.904838  | 21.18369 |
| Ghana   | 8189778   | 0.020419 | 0.004745 | 0.004275 | 0.00948  | 0.102884 | 0.030157 | 0.063115  | 0.00076  | 2.516451 | 0.016866 | 0.188093 | 0.061464 | 0.00259  | 0.241588 | 3.070777 | 0.05594   | 0.32084   | 3.68629  |
| Ghana   | 8189785   | 0.004952 | 0.009153 | 0.002126 | 0.005065 | 0.000845 | 0.001291 | 0.216905  | 0.000662 | 0.077461 | 0.004488 | 0.008369 | 0.02961  | 0.000965 | 0.014983 | 26.65498 | 23.96894  | 0.70634   | 20.13227 |
| Ghana   | 8189786   | 0.021109 | 0.00938  | 0.002491 | 0.009777 | 0.013932 | 0.005045 | 0.00141   | 0.000635 | 3.954295 | 0.018389 | 0.096753 | 0.055315 | 0.019343 | 2.790579 | 1.433766 | 17.40218  | 1.430891  | 313.8403 |
| Ghana   | 8189794   | 0.020674 | 0.014369 | 0.003003 | 0.008887 | 0.014699 | 0.00134  | 0.016204  | 0.000204 | 0.675194 | 0.012454 | 0.037822 | 0.076368 | 0.002372 | 0.007079 | 0.634729 | 0.041525  | 0.213809  | 0.084082 |
| Ghana   | 8189797   | 0.003422 | 0.006109 | 0.00029  | 0.002357 | 0.002635 | 0.048894 | 0.004046  | 0.000891 | 1.242884 | -        | 0.055532 | 0.003851 | 0.003874 | 0.014296 | 21.48074 | 7.922951  | 0.591072  | 7.940167 |
| Ghana   | 8189852   | 0.000894 | 0.004259 | 0.000343 | 0.010754 | 0.001215 | 0.000633 | 0.184917  | 0.000457 | 0.874424 | 0.009303 | 0.197075 | 0.002754 | 0.000404 | 0.828469 | 2.158056 | 3.34251   | 0.847705  | 1.364747 |
| Ghana   | 8189853   | 0.021665 | 0.006716 | 0.003851 | 0.00833  | 0.080515 | 0.008367 | 0.032386  | 0.00127  | 0.404581 | 0.01062  | 0.515079 | 0.065195 | 0.002173 | 0.540717 | 3.962889 | 5.461718  | 7.036152  | 23.38645 |
| Ghana   | 8189854   | 0.000354 | 0.008537 | 0.001448 | 0.007385 | 0.010897 | 0.011545 | 0.035362  | 0.000444 | 0.43152  | 0.001404 | 0.183831 | 0.004692 | 0.000243 | 0.838867 | 8.419754 | 12.82612  | 1.425929  | 4.722131 |
| Ghana   | 8189857   | 0.019819 | 0.002965 | 0.002949 | 0.006686 | 0.091786 | 0.002415 | 0.002106  | 0.000595 | 0.08351  | 0.003208 | 0.13106  | 0.059079 | 0.002577 | 0.201146 | 16.51708 | 1.475269  | 0.417484  | 250.3248 |
| Ghana   | 8189865   | 0.000313 | 0.007183 | 0.000855 | 0.001758 | 0.0011   | 0.001364 | 0.063183  | 0.00071  | 0.001694 | 0.005205 | 0.011946 | 0.00191  | 0.000252 | 0.006212 | 3.959842 | 5.330813  | 0.4024    | 146.8219 |
| Ghana   | 8189883   | 0.001125 | 0.003807 | 0.000699 | 0.010112 | 0.02796  | 0.008945 | 0.029834  | 5.15E-05 | 0.935932 | 0.001133 | 2.318048 | 0.001716 | 0.000552 | 0.487786 | 7.050658 | 9.119467  | 0.312781  | 21.18485 |
| Ghana   | 8189900   | 0.002224 | 0.006902 | 0.000376 | 0.00194  | 0.002555 | 0.00104  | 0.005495  | 0.001584 | 0.330876 | 0.002313 | 0.001591 | 0.002379 | 0.003689 | 0.155522 | 1.128387 | 0.761825  | 4.031893  | 0.664515 |
| Ghana   | 8189912   | 0.005561 | 0.009748 | 0.000577 | 0.00355  | 0.036796 | 0.002841 | 0.013296  | 0.000389 | 1.300988 | 1.76E-05 | 0.059852 | 0.011971 | 0.004424 | 0.12875  | 5.331896 | 0.913688  | 0.014474  | 0.858426 |
| Ghana   | 8189921   | 0.022261 | 0.011163 | 0.002909 | 0.000155 | 0.005264 | 0.001664 | 0.00104   | 0.001466 | 3.564422 | 0.000633 | 0.004936 | 0.069723 | 0.003157 | 0.518963 | 2.984955 | 1.151381  | 9.622831  | 1.150836 |

|       |         |          |          |          |          |          |          |          |          |          |          |          |          |          |          |          |          |          |          |
|-------|---------|----------|----------|----------|----------|----------|----------|----------|----------|----------|----------|----------|----------|----------|----------|----------|----------|----------|----------|
| Ghana | 8189951 | 0.019174 | 0.009357 | 0.002641 | 0.006712 | 0.00479  | 0.001205 | 0.01117  | 3.59E-05 | 0.877035 | -        | 0.004139 | 0.067905 | 0.00205  | 2.104828 | 1.851194 | 2.116334 | 7.839843 | 13.2154  |
| Ghana | 8189957 | 0.021408 | 0.008206 | -        | 0.000585 | 0.003722 | 0.002018 | 0.006632 | 0.000893 | 1.304183 | 3.39E-05 | 0.004843 | 0.065886 | 0.002994 | 0.011924 | 16.17843 | 10.14579 | 1.823509 | 17.15433 |
| Ghana | 8189964 | 0.018572 | 0.010147 | 0.001858 | 0.005623 | 0.078004 | 0.000413 | 0.008712 | 0.000465 | 2.096887 | 0.004319 | 0.108682 | 0.053989 | 0.001233 | 0.037591 | 57.44283 | 11.73999 | 2.360229 | 42.43042 |
| Ghana | 8189966 | 0.019351 | 0.004526 | 0.004331 | 0.013065 | 0.01105  | 0.002436 | 0.186675 | 0.001502 | 1.492682 | 0.00716  | 0.147289 | 0.0577   | 0.00175  | 0.122469 | 43.52949 | 21.50643 | 3.794024 | 124.1422 |
| Ghana | 8189970 | 0.001319 | 0.000957 | 0.000284 | 0.0015   | 0.072882 | 0.003269 | 0.008445 | 0.001026 | 3.327216 | 0.001645 | 0.200943 | 0.003643 | 0.000161 | 0.034268 | 32.30414 | 20.56207 | 2.592846 | 26.09219 |
| Ghana | 8191543 | 0.019871 | 0.001173 | 0.002891 | 0.012771 | 0.07886  | 0.005424 | 0.011365 | 0.002191 | 1.866204 | 0.00801  | 0.060255 | 0.063266 | 0.002011 | 0.039664 | 2.448358 | 0.747179 | 5.34864  | 25.94681 |
| Ghana | 8191552 | 0.019992 | 0.00202  | 0.003776 | 0.015074 | 0.014379 | 0.004983 | 0.224443 | 0.000417 | 1.637999 | 0.01548  | 0.02933  | 0.058672 | 0.001486 | 0.079201 | 33.54388 | 16.27901 | 7.435906 | 100.086  |
| Ghana | 8995989 | 0.021904 | 0.016104 | 0.003653 | 0.008599 | 0.074877 | 0.003924 | 0.003694 | 0.000299 | 0.42046  | 0.013604 | 0.150771 | 0.064129 | 0.002345 | 0.102442 | 10.5915  | 3.697084 | 0.380776 | 25.90763 |
| Ghana | 8995990 | 0.023366 | 0.001571 | 0.003114 | 0.00714  | 0.022942 | 3.37E-05 | 0.032044 | 0.000297 | 0.004651 | 0.001108 | 0.016382 | 0.069299 | 0.002122 | 0.017707 | 7.031686 | 4.320914 | 6.414059 | 77.22001 |
| Ghana | 9129588 | 0.000886 | 0.009421 | 0.001254 | 0.001996 | 0.000495 | 0.003761 | 0.17128  | 0.001171 | 0.977317 | 0.020743 | 0.012452 | 0.00757  | 0.005517 | 0.158566 | 5.45859  | 6.850178 | 0.155758 | 140.7558 |
| Ghana | 9129592 | 0.000723 | 0.004421 | 0.001571 | 0.010442 | 0.056865 | 0.000648 | 0.012171 | 0.000752 | 0.166919 | 0.010834 | 0.01384  | 0.00201  | 0.001467 | 0.035815 | 14.8005  | 4.709109 | 1.074401 | 16.39888 |
| Ghana | 9129600 | 0.017147 | 0.007974 | 0.00193  | 0.006147 | 0.007233 | 0.000211 | 0.032755 | 0.001922 | 0.247512 | 0.006346 | 0.017228 | 0.048191 | 0.001684 | 0.130881 | 27.06596 | 18.35996 | 3.830012 | 26.23402 |
| Ghana | 9129800 | 0.020627 | 0.000819 | 0.00245  | 0.016109 | 0.009476 | 0.000442 | 0.053347 | 0.00057  | 1.688144 | 0.024055 | 0.018115 | 0.055802 | 0.002439 | 0.053134 | 20.70884 | 6.286075 | 3.223393 | 17.13115 |
| Ghana | 9129814 | 0.021977 | 0.005783 | 0.002437 | 0.011666 | 0.00237  | 0.000694 | 0.001541 | 0.000797 | 0.370662 | 0.008947 | 0.48142  | 0.057741 | 0.037553 | 0.087726 | 25.03107 | 6.145396 | 33.04975 | 155.3749 |
| Ghana | 9129820 | 0.018506 | 0.005741 | 0.002377 | 0.007758 | 0.053891 | 0.003498 | 0.028428 | 0.000559 | 0.132173 | 0.00517  | 0.077003 | 0.050235 | 0.002526 | 0.039156 | 11.79206 | 5.365485 | 2.08381  | 6.388765 |
| Ghana | 9129832 | 0.022985 | 0.009612 | 0.003901 | 0.008838 | 0.011819 | 0.006561 | 0.000502 | 0.000391 | 0.086982 | 0.00342  | 0.046678 | 0.068198 | 0.005779 | 0.012476 | 15.37547 | 9.213304 | 1.562774 | 48.96423 |
| Mali  | 7964625 | 2.17E-05 | 0.000294 | 6.38E-06 | 0.00052  | 0.001752 | 0.000651 | 0.002237 | 0.000117 | 8.263766 | 2.77E-08 | 0.015237 | 0.003485 | -        | 0.041044 | 0.411225 | 0.254826 | 3.472648 | 0.353312 |
| Mali  | 7964716 | 2.24E-05 | 0.001457 | 9.13E-05 | 0.00117  | 0.002079 | 0.001405 | 0.000353 | -        | 0.732726 | 0.000946 | 0.001171 | 0.000131 | -        | 0.073014 | 1.997563 | 2.757189 | 1.780177 | 3.652289 |
| Mali  | 7964736 | 1.31E-05 | 0.000589 | 4.66E-06 | 0.000434 | 0.00051  | 0.000167 | 0.001476 | 0.000497 | 4.607602 | 0.000197 | 0.000124 | 3.75E-06 | -        | 0.075973 | 6.319556 | 0.687048 | 1.487487 | 0.607091 |
| Mali  | 8189671 | 6.72E-06 | 0.000503 | 1.36E-05 | 0.000894 | 0.01821  | 0.000988 | 0.002618 | -        | 2.857304 | 0.000998 | 0.00404  | 4.2E-05  | -        | 0.00309  | 6.299628 | 0.110953 | 0.089531 | 0.529811 |
| Mali  | 8189744 | 1.37E-05 | 0.000577 | 1.21E-05 | 0.000374 | 0.001026 | 0.000587 | 0.010996 | 2.25E-05 | 0.888359 | -        | 0.001124 | 3.79E-05 | -        | 0.030832 | 11.91438 | 3.252459 | 2.561234 | 7.549627 |
| Mali  | 8995831 | 1.71E-05 | 0.000345 | 5.19E-08 | 0.000448 | 0.002961 | 0.001666 | 0.003979 | 4.75E-05 | 2.184747 | 0.000982 | 0.000532 | 0.000189 | -        | 0.035259 | 6.609433 | 0.261367 | 0.452352 | 1.969427 |
| Mali  | 9129642 | 6.3E-05  | 0.001552 | 1.2E-05  | 0.0008   | 0.003799 | 0.000696 | 0.034847 | 0.00013  | 0.805681 | 0.000961 | 0.044222 | 0.00346  | -        | 0.000818 | 23.84973 | 4.316566 | 0.964573 | 21.31298 |
| Mali  | 9129670 | 5.14E-05 | 0.000276 | 1.16E-06 | 0.001634 | 0.035099 | 0.004692 | 0.022746 | 0.000606 | 26.0601  | 0.000127 | 0.011562 | 0.000222 | -        | 0.072851 | 12.5942  | 0.196855 | 0.517447 | 0.086512 |
| Mali  | 9129752 | 6.04E-05 | 0.001207 | 3.8E-06  | 0.000192 | 0.00732  | 0.001277 | 0.224092 | 0.000517 | 0.765115 | 0.000984 | 0.000871 | 1.74E-05 | -        | 0.01655  | 22.96354 | 1.278228 | 1.531575 | 0.661515 |
| Mali  | 9129763 | 2.88E-05 | 0.000402 | 5.76E-06 | 0.000328 | 0.002779 | 0.003279 | 0.065051 | 3.57E-05 | 0.783287 | 0.000996 | 0.001287 | 0.000225 | -        | 0.11405  | 0.970346 | 0.279877 | 0.695441 | 0.3658   |
| Mali  | 9129768 | 6.2E-05  | 0.000636 | 9.48E-05 | 0.001735 | 0.004725 | 0.001136 | 0.006614 | 0.000133 | 3.218401 | 0.000998 | 0.002327 | 4.22E-05 | -        | 0.003091 | 0.582606 | 0.471668 | 0.529759 | 2.644407 |
| Mali  | 9129786 | 9.05E-05 | 0.000148 | 3.73E-06 | 0.000728 | 0.003209 | 0.000859 | 0.015738 | 6.94E-05 | 1.434303 | 0.000996 | 0.045598 | 7.87E-05 | -        | 0.006016 | 0.092398 | 0.026545 | 0.074767 | 0.178277 |

C) Exceedance Agreement (relative to WHO GV for each TM)

| Element                           | Antimony | Arsenic | Cadmium | Chromium | Copper | Lead  | Manganese | Mercury | Nickel | Selenium | Zinc   | Tin    | Uranium | Iron   |
|-----------------------------------|----------|---------|---------|----------|--------|-------|-----------|---------|--------|----------|--------|--------|---------|--------|
| Agreement Proportion All (n=58)   | 100.0%   | 96.6%   | 77.2%   | 100.0%   | 100.0% | 93.1% | 98.3%     | 100.0%  | 12.1%  | 100.0%   | 96.6%  | 37.9%  | 95.7%   | 82.8%  |
| Agreement Proportion Ghana (n=46) | 100.0%   | 95.7%   | 71.1%   | 100.0%   | 100.0% | 93.5% | 97.8%     | 100.0%  | 15.2%  | 100.0%   | 95.7%  | 21.7%  | 95.7%   | 78.3%  |
| Agreement Proportion Mali (n=12)  | 100.0%   | 100.0%  | 100.0%  | 100.0%   | 100.0% | 91.7% | 100.0%    | 100.0%  | 0.0%   | 100.0%   | 100.0% | 100.0% | -       | 100.0% |

The results presented in these tables indicate that while results from Ghana, Niger, and Mali datasets may vary from those obtained when duplicates were analyzed by ICP-MS at UNC, particularly for low concentrations, agreement with respect to WHO GV exceedance was high for most TMs and indicator metals studied.

Figure S1. Indicative Calibration Curves

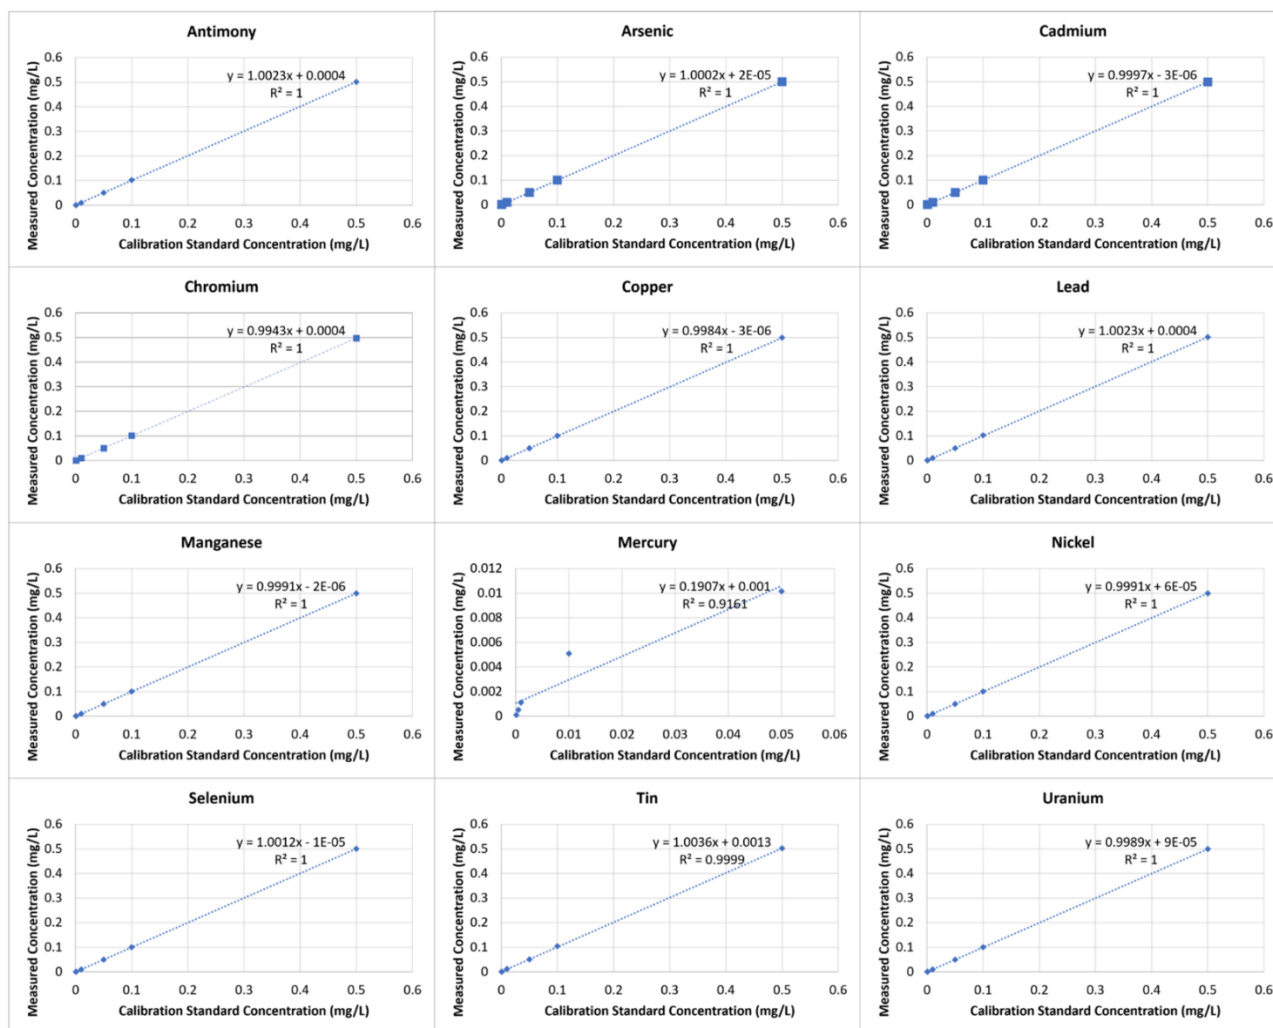

A) Ghana and Niger Samples – Indicative ICP-OES Calibration Curves

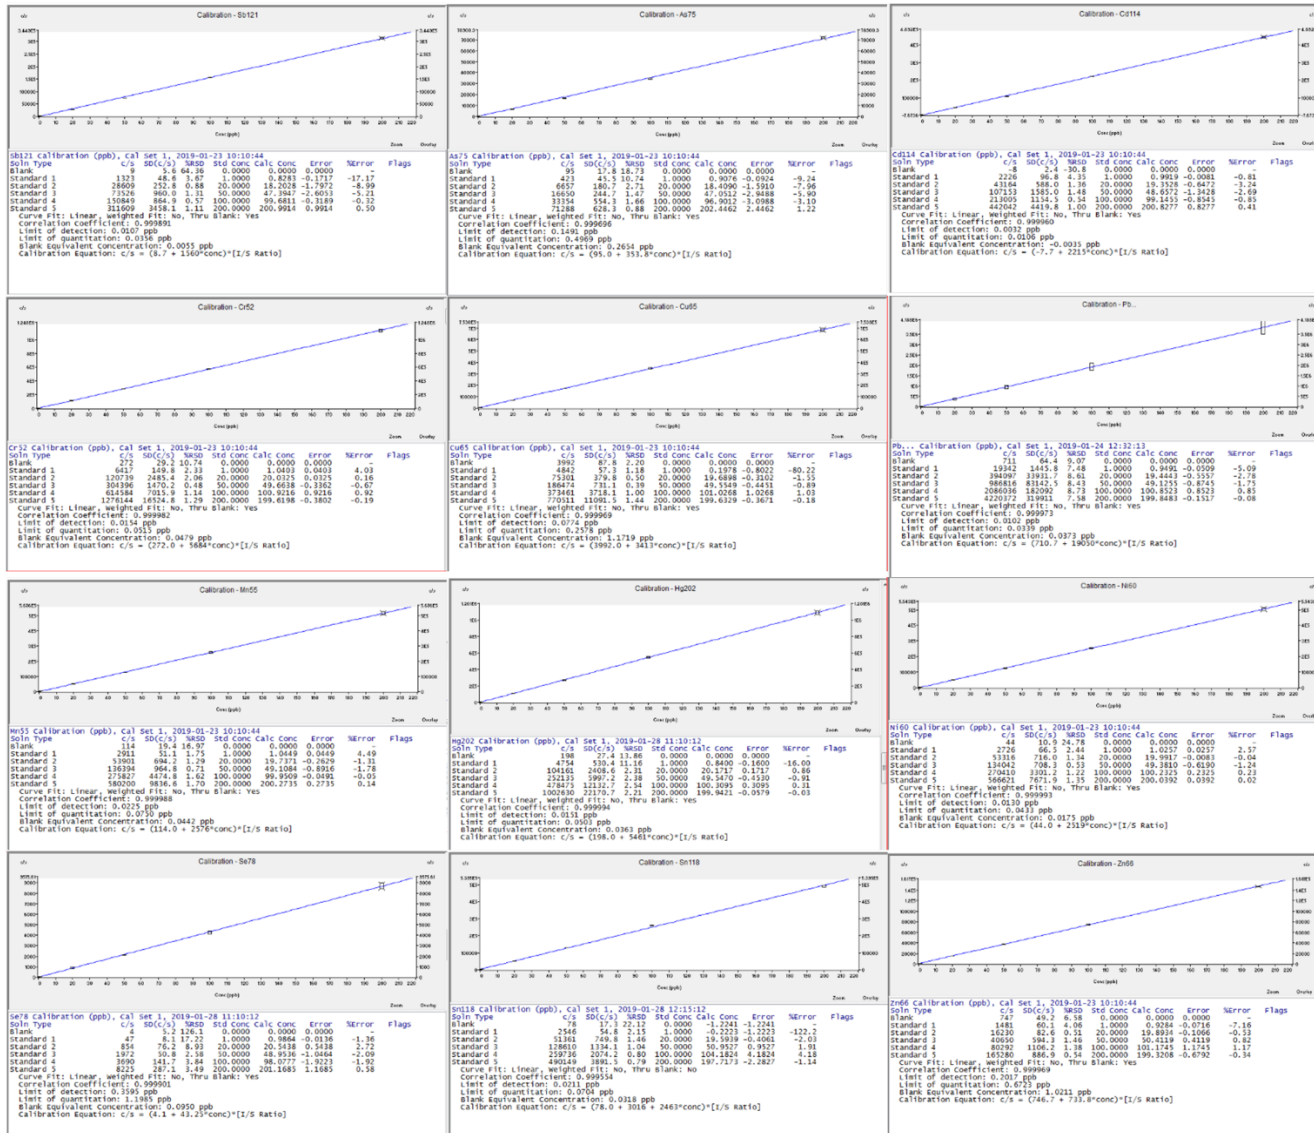

B) Mali – Indicative ICP-MS Calibration Curves

52 Cr [2] ISTD:45 Sc [2]  
x10<sup>3</sup>  
 $y = 0.2583 \cdot x + 0.1038$   
R = 1.0000  
DL = 0.03472 ppb  
BEC = 0.4017 ppb

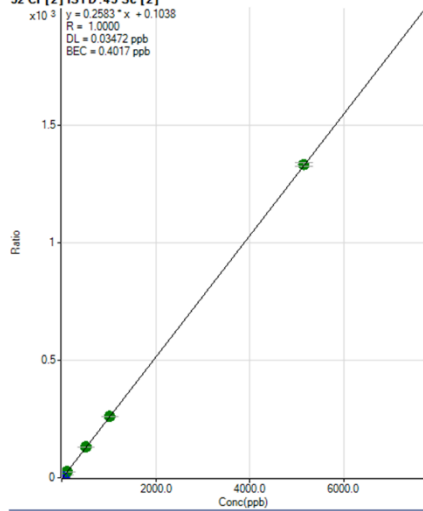

208 Pb [3] ISTD:115 In [3]  
x10<sup>3</sup>  
 $y = 0.1948 \cdot x + 0.0222$   
R = 0.9999  
DL = 0.01317 ppb  
BEC = 0.114 ppb

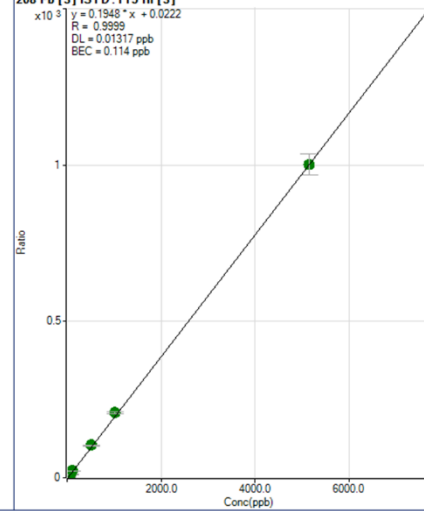

238 U [3] ISTD:115 In [3]  
 $y = 0.2186 \cdot x + 3.4764E-005$   
R = 1.0000  
DL = 0.0001428 ppb  
BEC = 0.000159 ppb

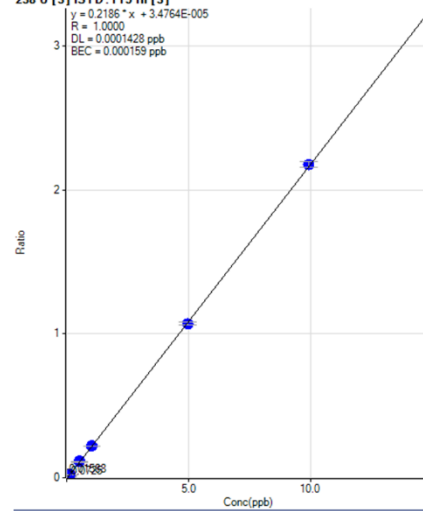

C) UNC Samples – Indicative ICP-MS Calibration Curves
