# Supplementary material
Source: PubMed Central journal article supplement (PMC8057680)
Supplement: ehp7804.smcontents.508.pdf [file ehp7804.smcontents.508.pdf]

**Note to readers with disabilities:** *EHP* strives to ensure that all journal content is accessible to all readers. However, some figures and Supplemental Material published in *EHP* articles may not conform to [508 standards](#) due to the complexity of the information being presented. If you need assistance accessing journal content, please contact [ehp508@niehs.nih.gov](mailto:ehp508@niehs.nih.gov). Our staff will work with you to assess and meet your accessibility needs within 3 working days.

### **Supplemental Material**

#### **Occurrence of Lead and Other Toxic Metals Derived from Drinking-Water Systems in Three West African Countries**

Michael B. Fisher, Amy Z. Guo, J. Wren Tracy, Sridevi K. Prasad, Ryan D. Cronk, Emily G. Browning, Kaida R. Liang, Emma R. Kelly, and Jamie K. Bartram

#### **Table of Contents**

**Table S1.** Positive predictive value (PPV), negative predictive value (NPV), and percent agreement between test and retest WHO GV exceedance results for TMs in test-retest comparisons of water samples from the same water systems (N=109).

**Table S2.** Mean, median, and maximum relative mass fraction of 13 metals from water system component scrapings (N=61 systems).

**Table S3.** Multivariable linear regressions for associations between concentrations of TM of interest and other measured metals (controlling for country, pH, conductivity, and stagnation time).

**Table S4.** Normalized multivariable linear regression for associations between concentrations of lead and other measured metals (controlling for country, pH, conductivity, and stagnation time).

**Table S5.** Multivariable regression of log lead occurrence controlling for log lead groundwater occurrence and controlling for other relevant covariates (pH, conductivity, water system type, water system age, stagnation time, and country).

**Table S6.** Comparison of Ghana and Mali Samples to UNC Reanalysis of Duplicate Aliquots.

**Figure S1.** Indicative Calibration Curves.

**Additional File-** Excel Documents
